# Supplementary material for: Reconfigurable MEMS Fano metasurfaces with multiple-input–output states for logic operations at terahertz frequencies
Source: PubMed Central journal article supplement (PMC6170453; doi:10.1038/s41467-018-06360-5), 2018-10-03
Supplement: 41467_2018_6360_MOESM3_ESM.pdf [file 41467_2018_6360_MOESM3_ESM.pdf]

## **Description of Additional Supplementary Files**

File Name: Supplementary Movie 1

Description: Non-Volatile operation of MEMS Fano device.

File Name: Supplementary Movie 2

Description: Volatile operation of MEMS Fano device.
